# Supplementary material for: Mechanistic comparison of saccharide depolymerization catalyzed by dicarboxylic acids and glycosidases
Source: Royal Society of Chemistry journal article supplement (doi:10.1039/c3ra41307a), 2013-01-01
Supplement: c3ra41307a.pdf [file c3ra41307a.pdf]

**Mechanistic comparison of saccharide depolymerization catalyzed by  
dicarboxylic acids and glycosidases**

Henning Kayser<sup>a</sup>, Francisco Rodríguez-Ropero<sup>b</sup>, Walter Leitner<sup>a,c</sup>, Marco Fioroni<sup>d\*</sup>,  
Pablo Domínguez de María<sup>a\*</sup>

**SUPPLEMENTARY INFORMATION**

**Scheme S1.** Acid-catalyzed mechanisms for the depolymerization of polysaccharides to release oligomers and sugars.

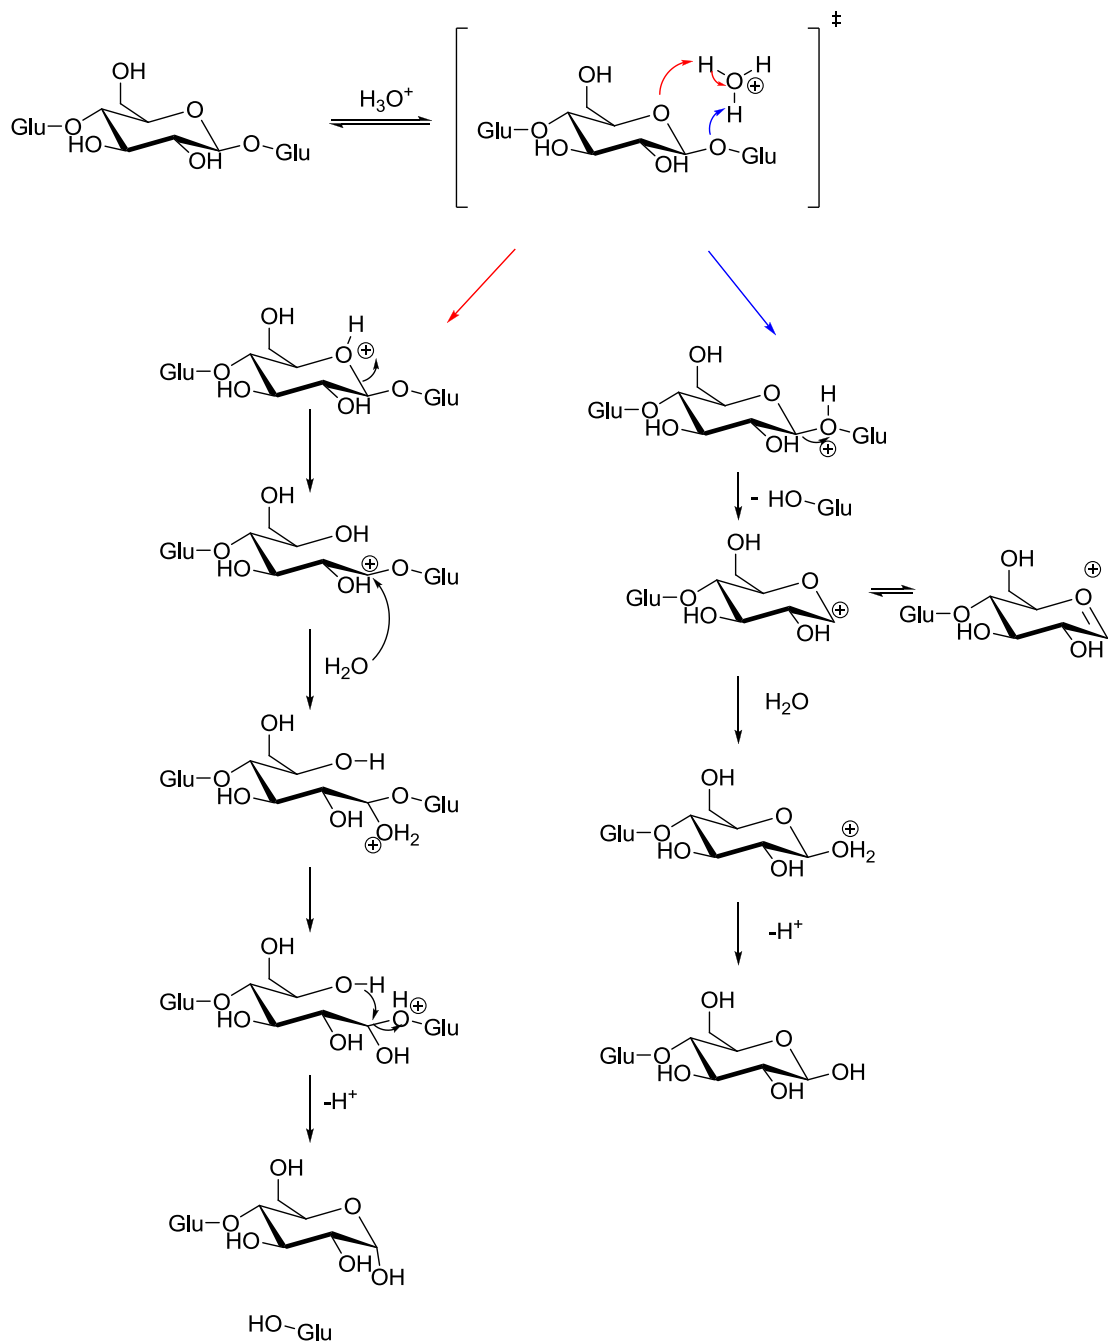

**Table S1.** Assessment of the acid-mediated degradation of glucose to 5-hydroxymethylfurfural (HMF). Conditions: Acids at different pH; Cellobiose 50 gL<sup>-1</sup>; 125 °C. Analytics: HPLC. Jasco HPLC equipped with a SugarSH1011 (8mm \* 300 mm) column (0.01% aq. acetic acid as eluent) and an UV/Vis- as well as a RI-detector.

| Acid    | pH   | [Cellobiose] gL <sup>-1</sup> | Reaction time (h) | HMF (%) |
|---------|------|-------------------------------|-------------------|---------|
| HCl     | 1.56 | 50                            | 0.5               | 0.03    |
| HCl     | 1.56 | 50                            | 2                 | 0.60    |
| HCl     | 1.44 | 50                            | 1                 | 0.40    |
| HCl     | 2.01 | 50                            | 2                 | 0.12    |
| Maleic  | 1.88 | 50                            | 2                 | 0.25    |
| Maleic  | 1.88 | 50                            | 22                | 3.70    |
| Fumaric | 2.63 | 50                            | 3                 | 0.60    |
| Oxalic  | 1.30 | 50                            | 3                 | 1.40    |
| Oxalic  | 1.70 | 50                            | 1                 | 0.27    |
| Formic  | 2.67 | 50                            | 1                 | 0.16    |

**Table S2.** Activation energies of cellobiose hydrolysis with different carboxylic acids, based on exponential Arrhenius plot,  $k_I(T) = A e^{-E^\ddagger/RT}$ . Pre-exponential factor (A) was fixed at  $A = 1 \cdot 10^{11}$  considering the  $\Delta S^\ddagger$  to be analogous in such homogeneous systems.

| Acid     | $E^\ddagger$ (kJ mol <sup>-1</sup> ) |
|----------|--------------------------------------|
| HCl      | 99 ± 3                               |
| Formic   | 98 ± 14                              |
| Acetic   | 100 ± 8                              |
| Oxalic   | 99 ± 6                               |
| Malonic  | 103 ± 12                             |
| Succinic | 99 ± 15                              |
| Glutaric | 97 ± 9                               |
| Adipic   | 97 ± 37                              |
| Pimelic  | 97 ± 20                              |
| Suberic  | 98 ± 12                              |
| Maleic   | 99 ± 16                              |

Figure S1.

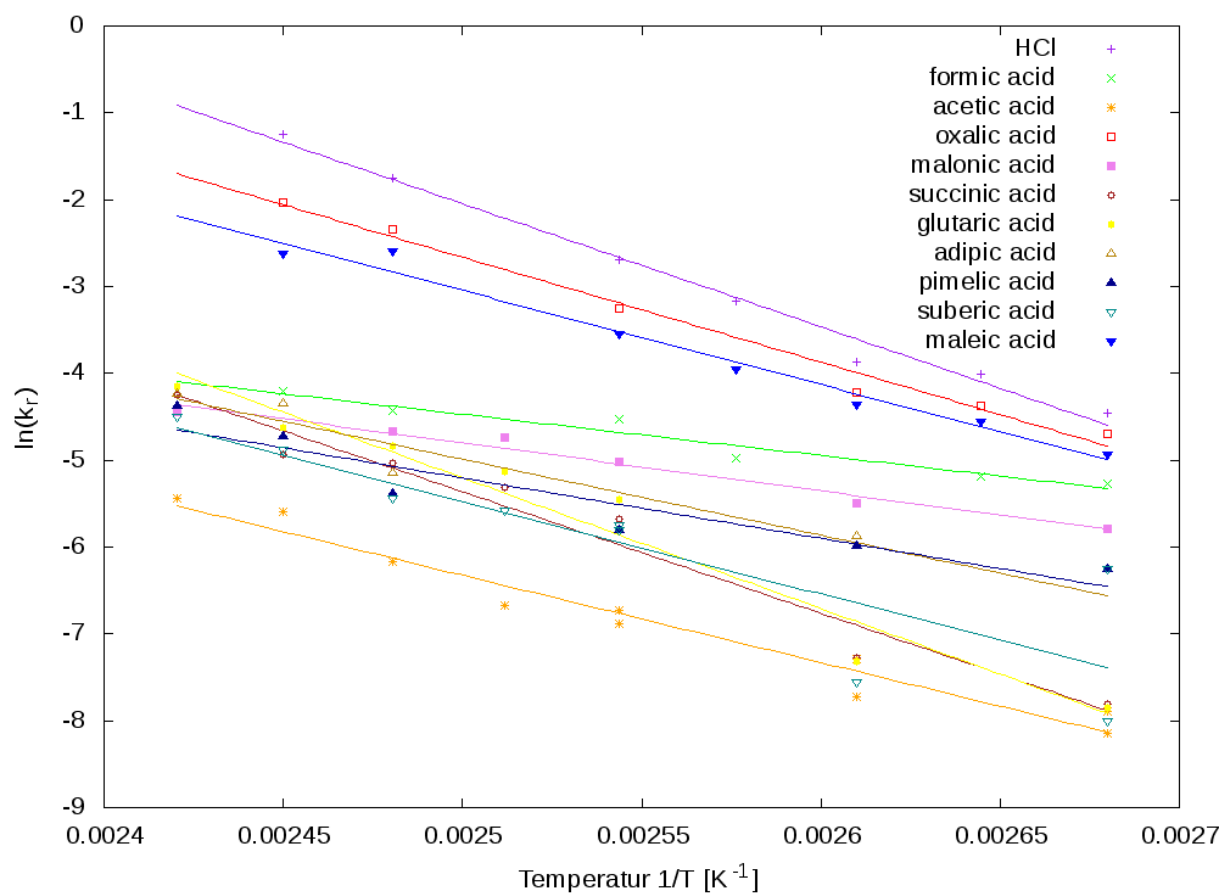

## DETERMINATION OF $pK_a$ AT DIFFERENT DIELECTRIC CONSTANTS.

To estimate the Glu  $pK_a$  shift ( $\Delta pK_a$ ) at different dielectric constants ( $\epsilon$ ), a simple acetic acid molecule was used (acetic acid:  $pK_a = 4.74$ , Glu:  $pK_a = 4.25$ ). The expression reported by Shields *et al.*<sup>1</sup> allows the determination of  $pK_a$  of a BH acid from a known  $pK_a$  acid of an AH acid:

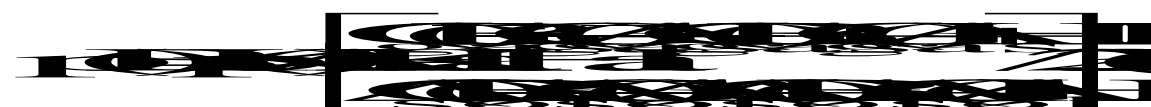

Where  $G_{gas}$  and  $G_{sol}$  are respectively the free energy values in the gas and solvated phases,  $R$  is the constant for ideal gases and  $T$  is the temperature. If AH is acetic acid in water ( $\epsilon = 78.39$ ), with a known  $pK_a$  (4.74), and BH is the same acetic acid but at different dielectric medium, since both AH and BH are the same species (acetic acid), terms related to the free energy in the gas phase may be suppressed ( $G_{gas}(B^-) = G_{gas}(A^-)$  and  $G_{gas}(BH) = G_{gas}(AH)$ ). Consequently the  $pK_a$  of acetic acid at different dielectric media ( $pK_a$  (BH)) can be obtained from:

$$pK_a(BH) = pK_a(AH) + [\Delta G_{sol}(B^-) - \Delta G_{sol}(A^-) - \Delta G_{sol}(BH) + \Delta G_{sol}(AH)] / 2.303 RT$$

To assess the effect of the polarity of the local aqueous environment more quantitatively, acetic acid was used as model for Quantum Mechanical calculations of solvation energies. The variation of the  $pK_a$  resulting from the change in the dielectric constant of the medium was estimated using Eq. 1, in analogy to the method of Shields *et al.*<sup>1</sup> for the prediction of  $pK_a$  values. The expression provides the  $pK_a$

calculation of a given acid as a function of media, using tabulated  $pK_a$  values in water.  
(Eq. 1).

$$pK_a^\epsilon = pK_a^{\text{water}} + [\Delta G_{\text{sol}}^\epsilon(\text{carboxylate}) - \Delta G_{\text{sol}}^{\text{water}}(\text{carboxylate}) - \Delta G_{\text{sol}}^\epsilon(\text{acid}) + \Delta G_{\text{sol}}^{\text{water}}(\text{acid})] / 2.303 RT \quad \text{Eq. 1}$$

The main advantage of Eq. 1 with respect to other previously proposed methodologies for  $pK_a$  estimation of weak acids, is that the value of the proton free energy is no longer required. Thus inaccuracies in values of such proton-related magnitudes – which must be estimated from experimental data, and not from QM calculations –, do not lead to any influence in the final result. Figure S2 depicts the increase of  $pK_a$  (starting from  $pK_a$  value of acetic acid in aqueous solution, 4.74). As observed, for acetic acid the difference  $\Delta pK_a$  significantly increases when  $\epsilon$  decreases.

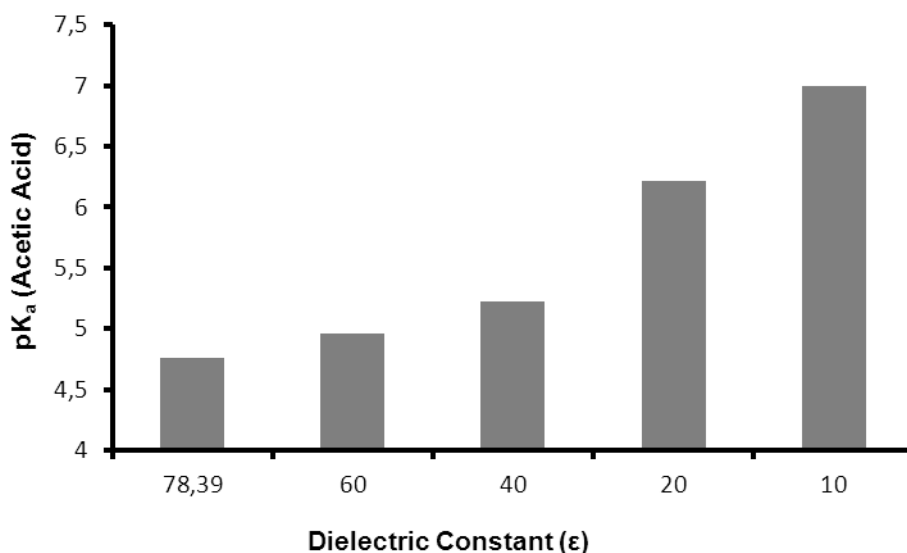

**Figure S2.**  $pK_a$  values for acetic acid at different dielectric constants ( $\epsilon$ ), retrieved by means of Quantum Mechanical (QM) calculations and Equation 1.

## OTHER ASSESSMENTS

Geometry of each transition state (TS) is depicted in Figure S3. As observed, for the concerted mechanism the distance between the proton in Glu162 and the glycosidic oxygen is 2.14 Å, different from the observed in the acidic catalysis (1.36 Å).

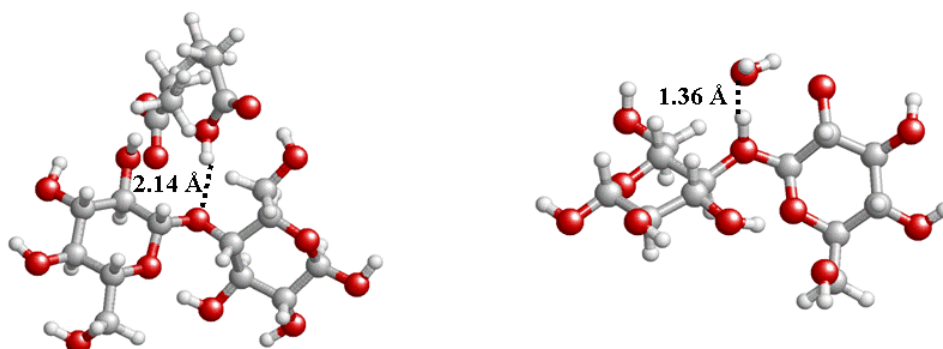

**Figure S3.** Transition state (TS) geometries for the cooperative mechanism (left) and acidic attack (right).

The role of the dielectric constant ( $\epsilon$ ) in the TS was studied, providing insights on which of the possible reaction paths would be followed by the reactants. The  $\Delta\Delta G$  of the two TS were calculated at different dielectric constant values ( $\epsilon = 80$  to 1, with  $\epsilon = 80$  as reference). In both cases energies increased at decreasing  $\epsilon$  values (see Table S2). At  $\epsilon = 20$  the  $\Delta\Delta G$  for the concerted mechanism increased 2.70 kcal mol<sup>-1</sup> whereas the acidic attack did 4.56 kcal mol<sup>-1</sup>.



**Table S3.**  $\Delta\Delta G$  calculated considering the reference TS in water ( $\epsilon=80$ ) for each of the acidic and concerted mechanism, comparing the trend for both the acidic and concerted TS, energies dramatically increase at low  $\epsilon$  values.

| $\epsilon$ | $\Delta\Delta G$ (TS) (kcal mol <sup>-1</sup> )<br>Acid Catalysis | $\Delta\Delta G$ (TS) (kcal mol <sup>-1</sup> )<br>Concerted mechanism |
|------------|-------------------------------------------------------------------|------------------------------------------------------------------------|
| 80         | 0.00                                                              | 0.00                                                                   |
| 60         | 0.68                                                              | 0.31                                                                   |
| 40         | 1.53                                                              | 0.90                                                                   |
| 20         | 4.56                                                              | 2.70                                                                   |
| 6          | 17.93                                                             | 10.91                                                                  |
| 1          | 85.86                                                             | 36.12                                                                  |

## CALCULATED DISTANCES BETWEEN CARBOXYLIC ACIDS

- H-H distance is the distance between the two H atoms in the carboxylic groups  
C-OO-H ... H-OO-C within the diacid
- C-C distance is the distance between the two C atoms in the carboxylic groups  
H-OO-C ... C-OO-H
- H-O distance is the shortest distance between one H atom in one carboxylic  
group and the non-protonated O atom in the other C-OO-H ... O=C
- O-O distance is the distance between the two non-protonated O atoms C=O ...  
O=C
- The energy is included to indicate which one of the two possible minima is the  
most stable.
- All calculations were done at the B3LYP/6-31G(d) level of calculation.

**Table S4. Diprotonated diacids.**

| <b>Compound</b>    | <b>H-H<br/>(Å)</b> | <b>C-C<br/>(Å)</b> | <b>H-O<br/>(Å)</b> | <b>O-O<br/>(Å)</b> | <b>ΔE<br/>(kcal/mol)</b> |
|--------------------|--------------------|--------------------|--------------------|--------------------|--------------------------|
| Oxalic (“cis”)     | 4.51               | 1.53               | 4.24               | 2.81               | 4.21                     |
| Oxalic (“trans”)   | 3.84               | 1.54               | 2.09               | 3.47               | 0.00                     |
| Malonic (“cis”)    | 6.08               | 2.50               | 4.43               | 3.24               | 1.78                     |
| Malonic (“trans”)  | 3.94               | 2.60               | 1.78               | 4.16               | 0.00                     |
| Succinic (“cis”)   | 6.89               | 3.87               | 5.80               | 5.22               | 0.00                     |
| Succinic (“trans”) | 6.70               | 3.86               | 4.81               | 5.02               | 4.35                     |
| Glutaric (“cis”)   | 7.18               | 5.08               | 7.00               | 7.03               | 0.00                     |
| Glutaric (“trans”) | 7.61               | 5.13               | 5.95               | 6.51               | 5.69                     |
| Adipic (“cis”)     | 8.36               | 6.40               | 8.09               | 7.54               | 0.00                     |
| Adipic (“trans”)   | 7.60               | 6.46               | 7.30               | 8.33               | 1.99                     |
| Pimelic (“cis”)    | 9.50               | 7.69               | 9.43               | 9.64               | 0.00                     |
| Pimelic (“trans”)  | 10.04              | 7.63               | 8.68               | 8.60               | 4.43                     |
| Suberic (“cis”)    | 10.92              | 8.95               | 10.48              | 10.00              | 0.00                     |
| Suberic (“trans”)  | 10.12              | 8.97               | 9.39               | 10.75              | 1.22                     |
| Maleic (cis)       | 2.52               | 3.45               | 3.77               | 5.79               | 5.69                     |
| Maleic (trans)     | 3.90               | 3.30               | 1.67               | 4.46               | 0.00                     |
| Fumaric (cis)      | 7.44               | 3.82               | 5.96               | 5.12               | 0.00                     |
| Fumaric (trans)    | 6.82               | 3.84               | 5.96               | 5.11               | 0.62                     |

**Table S5. Monoprotonated diacids.**

| <b>Compound</b> | <b>C-C (Å)</b> | <b>H-O (Å)</b> | <b>O-O (Å)</b> |
|-----------------|----------------|----------------|----------------|
| Oxalic          | 1.58           | 1.65           | 2.92           |
| Malonic         | 2.59           | 3.68           | 3.36           |
| Succinic        | 3.37           | 1.36           | 4.34           |
| Glutaric        | 5.14           | 3.88           | 6.28           |
| Adipic          | 6.51           | 6.26           | 7.54           |
| Pimelic         | 7.75           | 6.62           | 8.83           |
| Suberic         | 9.01           | 10.25          | 9.92           |
| Maleic          | 3.21           | 5.51           | 3.59           |
| Fumaric         | 3.89           | 5.96           | 5.10           |
| E162-E282       | 5.01           | 4.20           | 4.62           |

**Table S6. Deprotonated diacids.**

| <b>Compound</b> | <b>C-C (Å)</b> | <b>O-O (Å)</b> |
|-----------------|----------------|----------------|
| Oxalic          | 1.62           | 2.78           |
| Malonic         | 2.70           | 3.84           |
| Succinic        | 4.05           | 4.82           |
| Glutaric        | 5.35           | 5.33           |
| Adipic          | 6.64           | 7.24           |
| Pimelic         | 7.87           | 7.94           |
| Suberic         | 9.17           | 9.55           |
| Maleic          | 2.97           | 1.53           |
| Fumaric         | 4.02           | 5.12           |

**Reference**

1 M.D. Liptak, G.C. Shields, *Int. J. Quantum Chem.* 2001, **85**, 727-741.
